# Supplementary material for: Validating Hourly Satellite Based and Reanalysis Based Global Horizontal Irradiance Datasets over South Africa
Source: MDPI journal article supplement (doi:10.3390/geomatics1040025), 2021-11-05
Supplement: s1 [file s1]

Archive with 1 entries (1 files):
- geomatics-1395631 supplementary for publication.pdf
